# Supplementary material
Source: ML conference proceedings conference paper supplement (https://proceedings.neurips.cc/paper_files/paper/2015/hash/9996535e07258a7bbfd8b132435c5962-Abstract.html)
Supplement: Supplementary file [file 9996535e07258a7bbfd8b132435c5962-Supplemental.zip]

# Supplementary material: *High-dimensional neural spike train analysis with generalized count linear dynamical systems*

Here we provide details of the variational inference method for the generalized count linear dynamical system model (GCLDS).

## 1 VBEM algorithm details

### 1.1 Variational Inference in E-step

We first introduce the “vectorized” notation for the GCLDS model. Note that in the E-step the inference is separable across trials, so for ease of notation, we only consider one single trial and drop the trial index  $r$ . We assume  $N$  neurons observed during  $T$  time bins. Denote  $\mathbf{x}_t$  as the  $p$ -dimensional latent variable and  $\mathbf{y}_t$  as the  $N$ -dimensional observation, respectively.

$$\mathbf{x} := \begin{pmatrix} \mathbf{x}_1 \\ \vdots \\ \mathbf{x}_T \end{pmatrix}, \mathbf{y} := \begin{pmatrix} \mathbf{y}_1 \\ \vdots \\ \mathbf{y}_T \end{pmatrix}$$

The prior can be summarized as a multi-variate Gaussian distribution:

$$p(\mathbf{x}) = \mathcal{N}(\mu, \Sigma)$$

where

$$\mu = \begin{pmatrix} \mu_1 \\ A\mu_1 + b_1 \\ \vdots \\ A^{T-1}\mu_1 + \sum_{t=1}^{T-1} A^{T-1-t}b_t \end{pmatrix}, \Sigma^{-1} = \begin{pmatrix} Q_0^{-1} + A^T Q^{-1} A & A^T Q^{-1} & & \\ Q^{-1} A & Q^{-1} + A^T Q^{-1} A & A^T Q^{-1} & \\ & \ddots & \ddots & \ddots \end{pmatrix}.$$

The likelihood has the form

$$\begin{aligned} p(\mathbf{y}|\mathbf{x}) &= \prod_{t,i} p(y_{ti}|\eta_{ti}) \\ p(y_{ti}|\eta_{ti}) &= \mathcal{GC}(y_{ti}|\eta_{ti}, g_i(\cdot)) \\ \eta &:= W\mathbf{x} \\ W &= \text{blk-diag}(C, \dots, C), \end{aligned}$$

where we stack all the  $\eta_{ti}$  in  $\eta = (\eta_{11}, \dots, \eta_{1N}, \dots, \eta_{T1}, \dots, \eta_{TN}) \in \mathbb{R}^{NT}$ . The log likelihood reads:

$$\begin{aligned} \log p(\mathbf{x}, \mathbf{y}) &\propto -\frac{1}{2}(\mathbf{x} - \mu)^T \Sigma^{-1}(\mathbf{x} - \mu) + \sum_{t,i} [y_{ti}\eta_{ti} + g_i(y_{ti}) - \log(\sum_k \frac{1}{k!} \exp(k\eta_{ti} + g_i(k)))] \\ &\quad - \sum_{t,i} \log(y_{ti}!) - \frac{1}{2} \log |\Sigma| \end{aligned}$$

In the E-step we make a Gaussian approximation to the posterior:

$$p(\mathbf{x}|\mathbf{y}) \approx q(\mathbf{x}) = \mathcal{N}(\mathbf{x}|\mathbf{m}, V).$$

The variational lower bound reads:

$$\begin{aligned} \mathcal{L}(\mathbf{m}, V) &= \int q(\mathbf{x}) \log \frac{p(\mathbf{x}, \mathbf{y})}{q(\mathbf{x})} d\mathbf{x} \\ &= \frac{1}{2}(\log |V| - \text{tr}[\Sigma^{-1}V] - (\mathbf{m} - \mu)^T \Sigma^{-1}(\mathbf{m} - \mu)) \\ &\quad + \sum_{t,i} E_{q(\eta_{ti})} [\log p(y_{ti}|\eta_{ti})] - \frac{1}{2} \log |\Sigma| + \frac{dT}{2}. \end{aligned}$$

Defining  $\nu_{tik} = k\eta_{ti} + g_i(k) - \log k!$ , we know that  $\nu_{tik}$  is also normally distributed under the variational distribution

$$\nu_{tik} \sim \mathcal{N}(h_{tik}, \rho_{tik}).$$

Therefore we can re-write the term  $E_{q(x)}[\log p(y_{ti}|\eta_{ti})]$  and find a lower bound of the term by

$$\begin{aligned} &E_{q(\eta_{ti})} [\log p(y_{ti}|\eta_{ti})] \\ &= E_{q(\eta_{ti})} \left[ y_{ti}\eta_{ti} + g_i(y_{ti}) - \log(y_{ti}!) - \log(\sum_k \frac{1}{k!} \exp(k\eta_{ti} + g_i(k))) \right] \\ &= E_{q(\nu_{ti})} \left[ \nu_{tiy_{ti}} - \log(\sum_{k=0}^K \exp(\nu_{tik})) \right] \\ &\geq h_{tiy_{ti}} - \log(\sum_{k=0}^K E_{q(\nu_{ti})}(\exp(\nu_{tik}))) \\ &= h_{tiy_{ti}} - \log(\sum_{k=0}^K \exp(h_{nk} + \rho_{nk}/2)) \end{aligned}$$

where  $\nu_{ti} = (\nu_{ti1}, \dots, \nu_{tiK})$ . We always have  $\nu_{ti0} = \rho_{ti0} = 0$ . For the other variables define

$$\nu = (\nu_{11}, \nu_{12}, \dots, \nu_{1N}, \dots, \nu_{T1}, \dots, \nu_{TN})^T,$$

and define  $\mathbf{h}$  and  $\rho$  similarly. We then have the constraints

$$\begin{aligned} \mathbf{h} &:= \tilde{W}\mathbf{m} + \tilde{\mathbf{d}} \\ \rho &:= \text{diag}(\tilde{W}V\tilde{W}^T) \end{aligned}$$

where

$$\begin{aligned}\tilde{W} &= W \otimes (1, 2, \dots, K)^T \\ \tilde{\mathbf{d}} &= \mathbf{1}_{T \times 1} \otimes (g_1(1) - \log 1!, \dots, g_1(K) - \log K!, \dots, g_N(1) - \log 1!, \dots, g_N(K) - \log K!)^T\end{aligned}$$

where  $\otimes$  is the Kronecker product. Applying this lower bound and setting  $\nu_{ti0} = \rho_{ti0} = 0$ , we get the evidence lower bound (ELBO)

$$\begin{aligned}\mathcal{L}^*(\mathbf{m}, V, \mathbf{h}, \rho) &= \frac{1}{2}(\log |V| - \text{tr}[\Sigma^{-1}V] - (\mathbf{m} - \mu)^T \Sigma^{-1}(\mathbf{m} - \mu)) \\ &\quad + \sum_{t,i} \left[ \mathbf{1}_{\{y_{ti} > 0\}} h_{tiy_{ti}} - \log(1 + \sum_{k=1}^K \exp(h_{tik} + \rho_{tik}/2)) \right]\end{aligned}$$

the variational inference can now be cast as the optimization problem:

$$\begin{aligned}\max_{\mathbf{m}, V, \mathbf{h}, \rho} \quad & \mathcal{L}^*(\mathbf{m}, V, \mathbf{h}, \rho) \\ \text{subject to} \quad & V \succeq 0 \\ & \mathbf{h} = \tilde{W}\mathbf{m} + \tilde{\mathbf{d}} \\ & \rho = \text{diag}(\tilde{W}V\tilde{W}^T)\end{aligned}$$

Following [1], we can solve the dual problem

$$\min_{\alpha, \lambda} \max_{\mathbf{m}, V, \mathbf{h}, \rho} L(\mathbf{m}, V, \mathbf{h}, \rho) + \alpha^T(\mathbf{h} - \tilde{W}\mathbf{m} - \tilde{\mathbf{d}}) + \frac{1}{2}\lambda^T(\rho - \text{diag}(\tilde{W}V\tilde{W}^T)),$$

where  $\alpha, \lambda \in \mathbb{R}^{TNK}$  are the Lagrange multipliers. The unique maximizer with respect to  $(\mathbf{m}, V)$  is given by

$$\begin{aligned}\mathbf{m}^* &= \mu - \Sigma \tilde{W}^T \alpha \\ V^* &= B_{\lambda}^{-1} := (\Sigma^{-1} + \tilde{W}^T(\text{diag} \lambda) \tilde{W})^{-1}\end{aligned}$$

Maximization over  $(\mathbf{h}, \rho)$  is also available in close form. Collecting the term containing  $(\mathbf{h}, \rho)$ . for  $f^*$  to be finite, we need to enforce the constraint  $\alpha_{tik} = \lambda_{tik} - \mathbf{1}_{\{y_{ti}=k\}}$ . Therefore, we can express everything in terms of  $\lambda$

$$\begin{aligned}f_{ti}^*(\lambda_{ti}) &= \max_{\mathbf{h}, \rho} \alpha_{ti}^T \mathbf{h}_{ti} + \lambda_{ti}^T \rho_{ti} / 2 + \left[ \mathbf{1}_{\{y_{ti} > 0\}} h_{tiy_{ti}} - \log(1 + \sum_{k=1}^K \exp(h_{tik} + \rho_{tik}/2)) \right] \\ &= \sum_{k=1}^K \lambda_{tik} \log \lambda_{tik} + (1 - \sum_{k=1}^K \lambda_{tik}) \log(1 - \sum_{k=1}^K \lambda_{tik}).\end{aligned}$$

Denoting  $\tilde{y}_{ti} = (\mathbf{1}_{\{y_{ti}=1\}}, \mathbf{1}_{\{y_{ti}=2\}}, \dots, \mathbf{1}_{\{y_{ti}=K\}})$  and  $\tilde{y} = (\tilde{y}_{11}, \dots, \tilde{y}_{1N}, \dots, \tilde{y}_{T1}, \dots, \tilde{y}_{TN})$ , the dual

problem is reduced to

$$\begin{aligned} \min_{\lambda} \quad & D(\lambda) \\ \text{subject to} \quad & \lambda_{tik} > 0 \\ & \sum_{k=1}^K \lambda_{tik} < 1, \quad t = 1, \dots, T, n = 1, \dots, N, k = 1, \dots, K \end{aligned}$$

where

$$D(\lambda) := \frac{1}{2}(\lambda - \tilde{y})^T \tilde{W} \Sigma \tilde{W}^T (\lambda - \tilde{y}) - (\tilde{W} \mu + \tilde{\mathbf{d}})^T (\lambda - \tilde{y}) - \frac{1}{2} \log |B_\lambda| + \sum_{t,i} f_{ti}^*(\lambda_{ti})$$

and the gradient of the dual reads

$$D'(\lambda) = \tilde{W} \Sigma \tilde{W}^T (\lambda - \tilde{y}) - \tilde{W} \mu - \tilde{\mathbf{d}} - \frac{1}{2} \text{diag}(W B_\lambda^{-1} W^T) - \sum_n f_{ti}^{*'}(\lambda_{ti})$$

## 1.2 M-step

We have two sets of parameters to optimize in the M-step. One set is for the observation  $(C, \{g_i(\cdot)\}_i)$ , the other is for the dynamical system  $(A, \{\mathbf{b}_t\}_t, Q, Q_1, \mu_1)$ . It turns out that the M-step can be performed separately for these two sets.

The part of the likelihood about the observation can be written as

$$\begin{aligned} \mathcal{L}_1(C, g) = \sum_{i=1}^N \left[ \sum_{\substack{t=1, \dots, T \\ r=1, \dots, R}} y_{rti} (c_i^T m_{rt}) + g_i(y_{rti}) \right. \\ \left. - \log \left( 1 + \sum_{k=1}^K \frac{1}{k!} \exp(k(c_i^T m_{rt}) + g_i(k) + \frac{1}{2} k^2 c_i^T V_{rt} c_i) \right) \right] \end{aligned}$$

This part is concave and can be optimized efficiently using convex optimization techniques.

The part of the likelihood about the dynamical system has the form

$$\begin{aligned} \mathcal{L}_2(A, Q, Q_1, \mu_1) = \sum_{r=1}^R E_{q(\mathbf{x}_r)} \left[ -\frac{1}{2} (\mathbf{x}_{r1} - \mu_1)^T Q_1^{-1} (\mathbf{x}_{r1} - \mu_1) \right. \\ \left. - \frac{1}{2} \sum_{t=1}^{T-1} (\mathbf{x}_{r(t+1)} - A \mathbf{x}_{rt} - \mathbf{b}_t)^T Q^{-1} (\mathbf{x}_{r(t+1)} - A \mathbf{x}_{rt} - \mathbf{b}_t) \right. \\ \left. - \frac{1}{2} \log |Q_1| - \frac{T-1}{2} \log |Q| \right] \end{aligned}$$

Since everything is quadratic with respect to  $\mathbf{x}$ , the expectation can be calculated analytically. Moreover, all the parameters can be optimized analytically in close form.

## References

- [1] M. Emtiyaz Khan, A. Aravkin, M. Friedlander, and M. Seeger, “Fast dual variational inference for non-conjugate latent gaussian models,” in *Proceedings of The 30th International Conference on Machine Learning*, pp. 951–959, 2013.
